# Supplementary material for: Evolutionary novelty in the apoptotic pathway of aphids
Source: PubMed Central journal article supplement — Proc Natl Acad Sci U S A. 2020 Dec 7;117(51):32545–56. doi: 10.1073/pnas.2013847117 (PMC7768685; doi:10.1073/pnas.2013847117), 2020-12-07
Supplement: pnas.2013847117.sapp.pdf [file pnas.2013847117.sapp.pdf]

# PNAS

[www.pnas.org](http://www.pnas.org)

Supplementary Information for

Evolutionary novelty in the apoptotic pathway of aphids

Mélanie Ribeiro Lopes, Nicolas Parisot, Karen Gaget, Cissy Huygens, Sergio Peignier, Gabrielle Duport, Julien Orleans, Hubert Charles, Pieter Baatsen, Emmanuelle Jouselin, Pedro Da Silva, Korneel Hens, Patrick Callaerts & Federica Calevro

Corresponding authors: Federica Calevro & Patrick Callaerts  
Email: [federica.calevro@insa-lyon.fr](mailto:federica.calevro@insa-lyon.fr) and [patrick.callaerts@kuleuven.be](mailto:patrick.callaerts@kuleuven.be)

**This PDF file includes:**

Supplementary Materials and Methods  
Figures S1 to S7  
Tables S1 to S5  
Legends for Datasets S1 and S2

**Other supplementary materials for this manuscript include the following:**

Datasets S1 and S2

## Supplementary Materials and Methods

**Phylogenetic reconstruction and protein annotation.** For the reconstruction of phylogenetic trees, isolated CASc or BIR domains were aligned using the MAFFT multiple alignment program v7 (<https://mafft.cbrc.jp/alignment/server/>) and the L-INSI method. Graphical representations of the results were performed with ESPript v3.0 (1). Bayesian phylogenetic inferences were then conducted using MrBayes v3.2.7 (2). We ran two independent analyses with four chains each for 15 million generations, using WAG+I+G4 and WAG models for caspases and IAPs, respectively, as selected by Modeltest using the Bayesian Information Criterion metric (3). The maximum likelihood estimation method, implemented in IQ-TREE v1.6.2 (4), was also used to construct trees from the same data using the same substitution models and 1000 bootstrap replicates. Preliminary phylogenetic analyses, performed using all the retrieved IAP BIR domains, generated four clusters (Fig. S3): (i) cluster 1 includes the BIR\_1/2, BIR\_1/3 and BIR\_2/3 domains from DIAP1/DIAP2-like proteins, (ii) cluster 2 includes the BIR\_2/2 and BIR\_3/3 from DIAP1/DIAP2-like proteins as well as the BIR domains from single-BIR containing aphid-specific IAPs (i.e. Ap-IAP-C), (iii) cluster 3 includes the BIR domains from dBruce-like proteins and (iv) cluster 4 includes the BIR domains from Deterin-like proteins. As cluster 1 included sequences that were very divergent, we focused only on clusters 2, 3 and 4 for the final phylogenetic analyses (Fig. 2).

**Spatio-temporal qRT-PCR analysis.** Real-time RT-PCR reactions were performed on a CFX Connect™ Real-Time PCR Detection System (BioRad, Hercules, CA, USA) using 1:5-diluted cDNAs and SYBR Green PCR Master Mix (Roche, Basel, Switzerland) according to the manufacturer's instructions. mRNA levels were quantified relative to the constitutively expressed *rp17* (NP\_001129370.1) gene that was retained by the BestKeeper software tool v1 (5) as the best normalization gene compared with other candidates: *actin* (NP\_001119672.1) and *rp132* (NP\_001119682.1). For each aphid life stage analyzed, three independent biological replicates were processed and all qRT-PCR reactions were performed in technical triplicates. Relative expression levels were calculated as previously described (6).

**3D Modeling and molecular docking.** The stereochemical quality and energy of the aphid modeled BIR domains were evaluated using the PROCHECK software v3.5 (7) and the ProSA (Protein Structure Analysis) server (8), respectively. A representative model of each aphid BIR domain was selected and energy minimized with the Maestro v11.2 software (Schrödinger, LLC, New York, NY, USA). The figures of 3D modeled BIR structures were prepared with the PyMOL molecular Graphics System, v2.0 (Schrödinger, LLC, New York, NY, USA). For the molecular docking step, molecules were refined by energy minimization within Maestro as above. The figures of structural features of the IBM groove of BIR domain binding the tetrapeptide AVPI were displayed with the CCP4mg molecular-graphics software v2.10.11 (9).

**Gateway cloning.** PCR products were cloned into the pUGa vector using a two-step Gateway cloning protocol. To construct the pUGa vector, the pUAST-attB vector was linearized with EcoRI and XbaI (New England Biolabs, Ipswich, USA), the resulting sticky ends were filled with T4 DNA polymerase (New England Biolabs, Ipswich, USA) and the reading frame B Gateway cassette from the Gateway conversion system (Thermo Fisher Scientific) was ligated in using T4 DNA ligase (New England Biolabs, Ipswich, USA). Gateway cloning was performed by mixing 50 ng of the pDONR221 vector (Thermo Fisher Scientific), 150 ng of the PCR product and 1 µl of BP clonase II enzyme mix (Thermo Fisher Scientific). After incubating for 18 h at 25°C, this mix was transformed into competent One Shot TOP10 cells (Thermo Fisher Scientific) and single colonies were analyzed by colony PCR with M13F and M13R primers using standard protocols. Colonies that gave PCR products of correct size were prepped using the NucleoSpin Plasmid DNA purification kit (Thermo Fisher Scientific), following the manufacturer's instructions, and the plasmids sequenced to select successful entry clones (Source BioScience, Nottingham, UK). The IAP ORFs were subcloned from these entry clones into a pUGa vector by mixing 100 ng of the entry clone, 50 ng of the vector and 1 µl of LR clonase II enzyme mix (Thermo Fisher Scientific). After incubating for 18 h at 25°C, this mix was transformed into competent One Shot TOP10 cells (Thermo Fisher Scientific) and single colonies were analyzed as previously. All successfully subcloned IAPs were prepped and diluted to a final concentration of 100 ng/µl. The plasmid preps were checked again by PCR to verify that no arraying errors were made during prepping.

***Drosophila* eye-based screening assay.** The *Drosophila* eye-based screening assay used in this study was initially developed by Hay *et al.* (10) to confirm the anti-apoptotic role of *Drosophila melanogaster* DIAP1 and DIAP2. Since then, the assay has been used successfully in several studies to assess pro- or anti-apoptotic potential of diverse proteins among which putative caspases (11, 12), IAPs (13, 14), IAP antagonists (15-18) or other apoptosis-related proteins (19-24).

**Scanning electron microscopy.** Samples for scanning electron microscopy were fixed and stored in 70% EtOH. Samples were then transferred to 100% EtOH, dried using hexamethyldisilazane (HMDS), mounted on stubs and coated with 10nm chrome. Observations were made and images taken on a Zeiss Sigma VP scanning electron microscope (Carl Zeiss Microscopy GmbH, Jena, Germany), operated at 2kV with secondary electron detector under high vacuum, or to suppress charging of the sample, at 10 kV with Variable Pressure Secondary Electron detector at 12 Pascal (N<sub>2</sub>-gas).

## Supplementary Methods References

1. X. Robert, P. Gouet, Deciphering key features in protein structures with the new ENDscript server. *Nucleic Acids Res.* **42**, W320-324 (2014).
2. J. P. Huelsenbeck, F. Ronquist, R. Nielsen, J. P. Bollback, Bayesian inference of phylogeny and its impact on evolutionary biology. *Science* **294**, 2310-2314 (2001).
3. D. Posada, K. A. Crandall, MODELTEST: testing the model of DNA substitution. *Bioinformatics* **14**, 817-818 (1998).
4. B. Q. Minh *et al.*, IQ-TREE 2: New models and efficient methods for phylogenetic inference in the genomic era. *Mol. Biol. Evol.* **37**, 1530-1534 (2020).
5. M. Pfaffl, A. Tichopad, C. Prgomet, T. Neuvians, Determination of stable housekeeping genes, differentially regulated target genes and sample integrity: BestKeeper-Excel-based tool using pairwise correlations. *Biotechnol. Letters* **26**, 509-515 (2004).
6. P. Sapountzis *et al.*, New insight into the RNA interference response against cathepsin-L gene in the pea aphid, *Acyrtosiphon pisum*: molting or gut phenotypes specifically induced by injection or feeding treatments. *Insect Biochem. Mol. Biol.* **51**, 20-32 (2014).
7. R. A. Laskowski, J. A. Rullmann, M. W. MacArthur, R. Kaptein, J. M. Thornton, AQUA and PROCHECK-NMR: programs for checking the quality of protein structures solved by NMR. *J. Biomol. NMR* **8**, 477-486 (1996).
8. M. Wiederstein, M. J. Sippl, ProSA-web: interactive web service for the recognition of errors in three-dimensional structures of proteins. *Nucleic Acids Res.* **35**, W407-410 (2007).
9. S. McNicholas, E. Potterton, K. S. Wilson, M. E. Noble, Presenting your structures: the CCP4mg molecular-graphics software. *Acta Crystallogr. D. Biol. Crystallogr.* **67**, 386-394 (2011).
10. B. A. Hay, D. A. Wassarman, G. M. Rubin, *Drosophila* homologs of baculovirus inhibitor of apoptosis proteins function to block cell death. *Cell* **83**, 1253-1262 (1995).
11. P. Meier, J. Silke, S. J. Leever, G. I. Evan, The *Drosophila* caspase DRONC is regulated by DIAP1. *EMBO J.* **19**, 598-611(2000).
12. N. L. Harvey *et al.*, Characterization of the *Drosophila* caspase, DAMM. *J. Biol. Chem.* **276**, 25342-25350 (2001).
13. R. Wilson *et al.*, The DIAP1 RING finger mediates ubiquitination of Dronc and is indispensable for regulating apoptosis. *Nat. Cell. Biol.* **4**, 445-450 (2002).
14. C. Domingues, H. D. Ryoo, *Drosophila* BRUCE inhibits apoptosis through non-lysine ubiquitination of the IAP-antagonist REAPER. *Cell Death Differ.* **19**, 470-477 (2012).
15. J. P. Wing, M. Schwartz, J. R. Nambu, The RHG motifs of *Drosophila* Reaper and Grim are important for their distinct cell death-inducing abilities. *Mech. Dev.* **102**, 193-203 (2001).
16. T. Tenev, A. Zachariou, R. Wilson, A. Paul, P. Meier, Jafrac2 is an IAP antagonist that promotes cell death by liberating Dronc from DIAP1. *EMBO J.* **21**, 5118-5129 (2002).
17. J. P. Wing *et al.*, *Drosophila* sickle is a novel grim-reaper cell death activator. *Curr. Biol.* **12**, 131-135 (2002).
18. F. S. Khan *et al.*, The interaction of DIAP1 with dOmi/HtrA2 regulates cell death in *Drosophila*. *Cell Death Differ.* **15**, 1073-1083 (2008).
19. T. Igaki *et al.*, Eiger, a TNF superfamily ligand that triggers the *Drosophila* JNK pathway. *EMBO J.* **21**, 3009-3018 (2002).
20. M. Mallik, S. C. Lakhota, The developmentally active and stress-inducible noncoding hromosome gene is a novel regulator of apoptosis in *Drosophila*. *Genetics* **183**, 831-852 (2009).

21. J. P. Ribaya *et al.*, The deubiquitinase emperor's thumb is a regulator of apoptosis in *Drosophila*. *Dev. Biol.* **329**, 25-35 (2009).
22. J. A. Schoenherr *et al.*, *Drosophila* activated Cdc42 kinase has an anti-apoptotic function. *PLoS Genet.* **8**, e1002725 (2012).
23. S. A. Sinenko, Proapoptotic function of deubiquitinase DUSP31 in *Drosophila*. *Oncotarget* **8**, 70452-70462 (2017).
24. A. Kumar, A. K. Tiwari, Molecular chaperone Hsp70 and its constitutively active form Hsc70 play an indispensable role during eye development of *Drosophila melanogaster*. *Mol. Neurobiol.* **55**, 4345-4361 (2018).

## Supplementary Figures

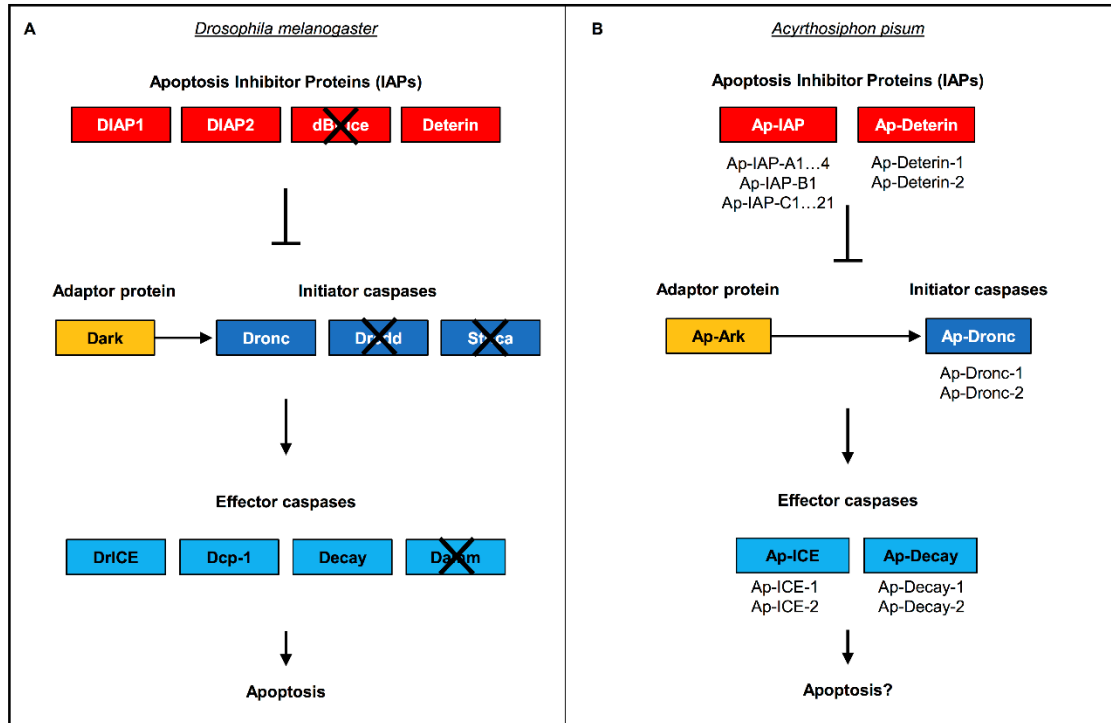

**Figure S1. The apoptotic pathways in the fruit fly and pea aphid genomes.** Schematic overview of the apoptotic pathways in *Drosophila melanogaster* (A) and *Acyrthosiphon pisum* (B). Several proteins of *D. melanogaster* (the inhibitor dBruce and the caspases Dredd, Strica and Damm, indicated by black cross) do not have homologs in *A. pisum*. Genes encoding other proteins have undergone multiple duplications that notably led to a significant expansion of the IAP family. Paralogs were given the same name and numbered to facilitate their identification. They are listed underneath the box containing their common name.

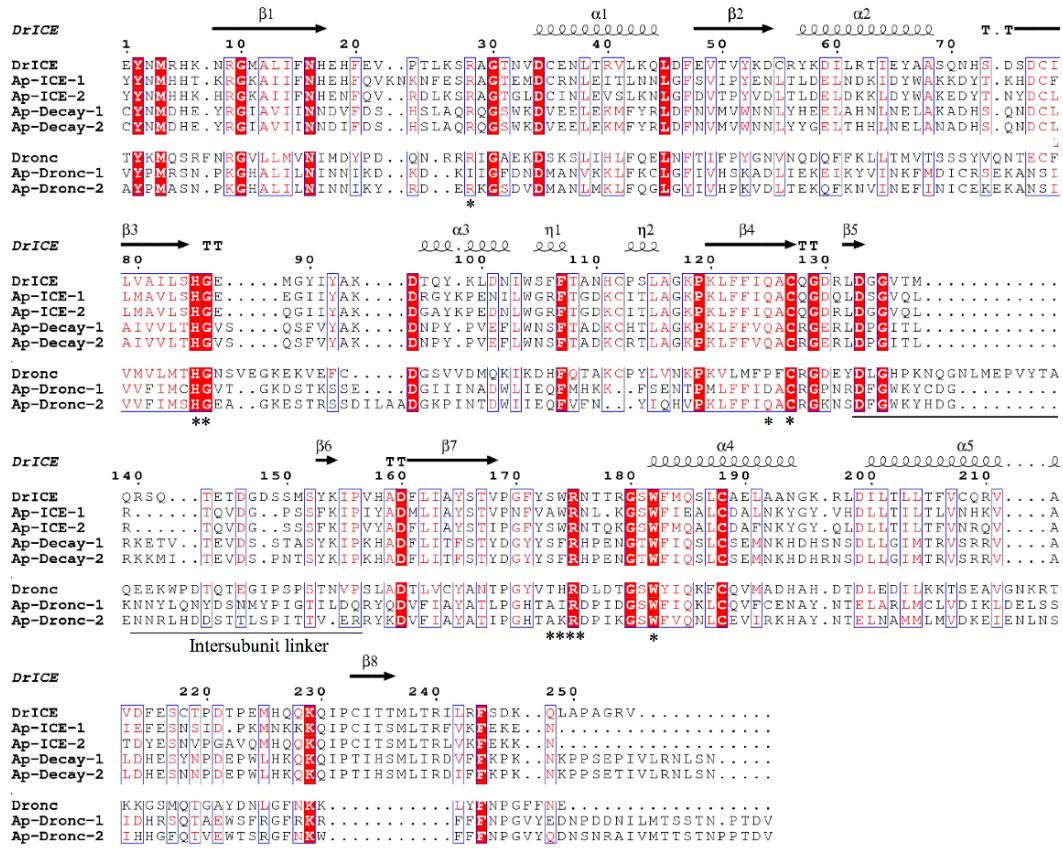

**Figure S2. Pea aphid caspases contain the residues necessary for their proteolytic action.** The sequence alignment of CASc domains from *Acyrtosiphon pisum* and *Drosophila melanogaster* caspases shows conserved motifs (highlighted in red when fully conserved, written in red when partially conserved). Residues involved in substrate recognition and catalysis are marked (\*). The portions of sequence found upstream and downstream of the indicated inter-subunit linker correspond to the p20 and p10 subunits, respectively. When several transcripts were available, the longest one was selected for alignment. The corresponding secondary structure (arrow,  $\beta$ -strand; helix,  $\alpha$ -helix) is reported in black above the alignment (DrICE as a reference).

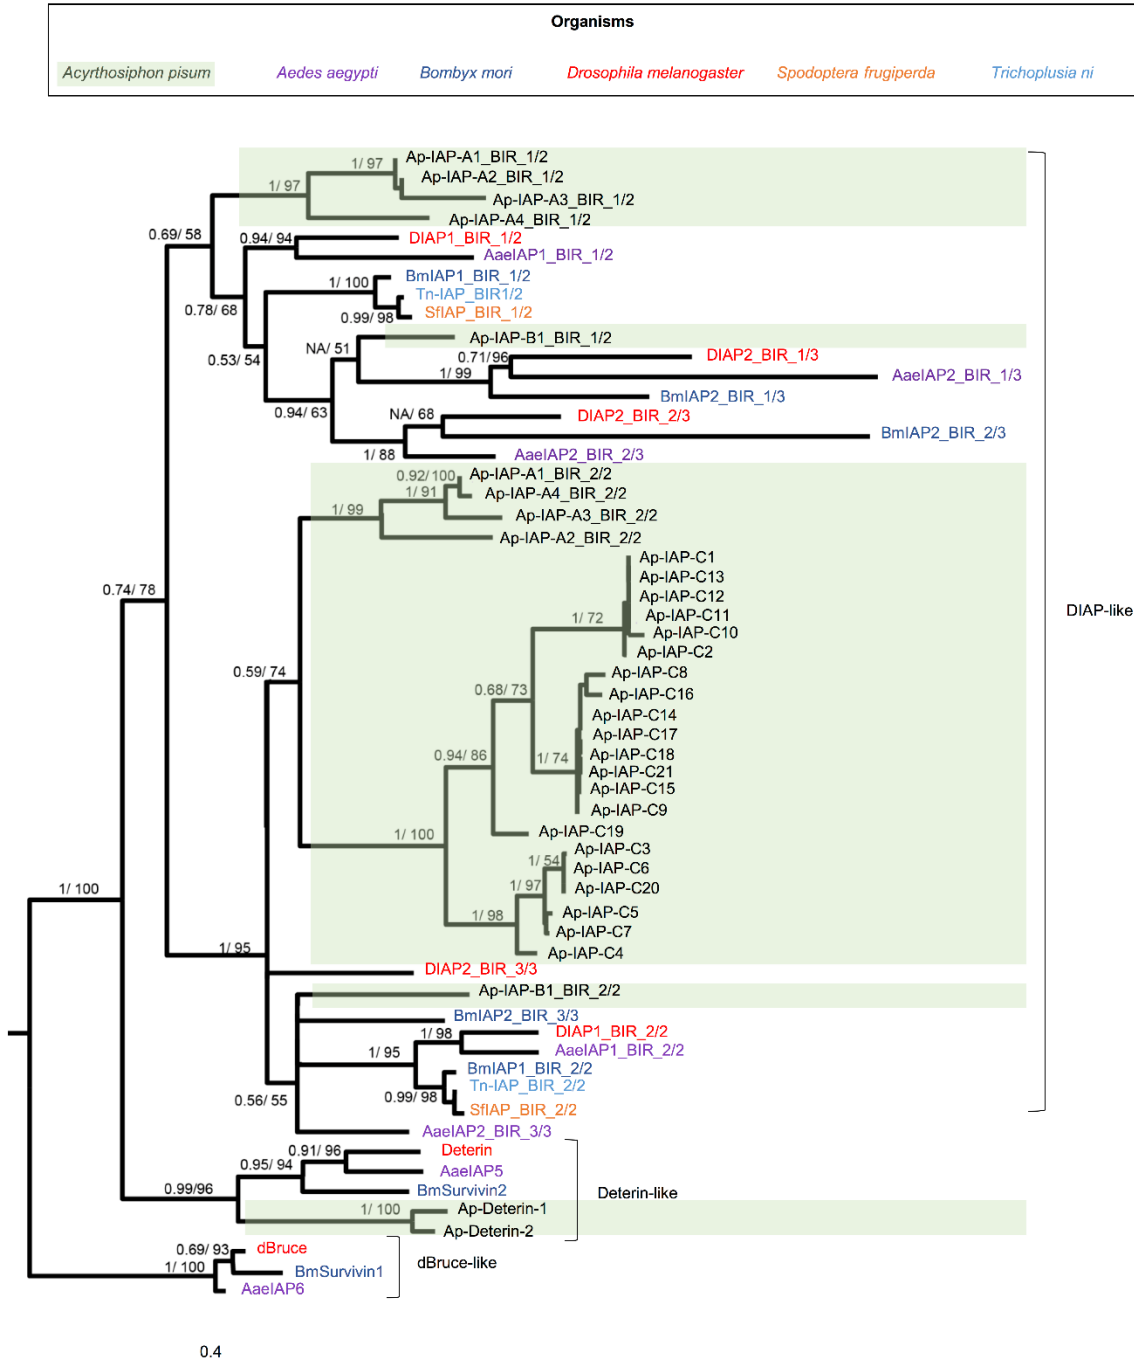

**Figure S3. Phylogenetic relationships between IAP sequences found in *Acyrtosiphon pisum* and their counterparts in different insects.** A phylogenetic reconstruction was conducted using the complete set of isolated BIR domains of IAPs from the insects *Acyrtosiphon pisum*, *Aedes aegypti*, *Bombyx mori*, *Drosophila melanogaster*, *Spodoptera frugiperda* and *Trichoplusia ni*. When an IAP possesses several BIR domains, they are numbered to differentiate them (e.g. BIR\_1/2, BIR\_2/2). For each node, Bayesian posterior probability and bootstrap values are indicated. Midpoint rooting was used to present the tree.



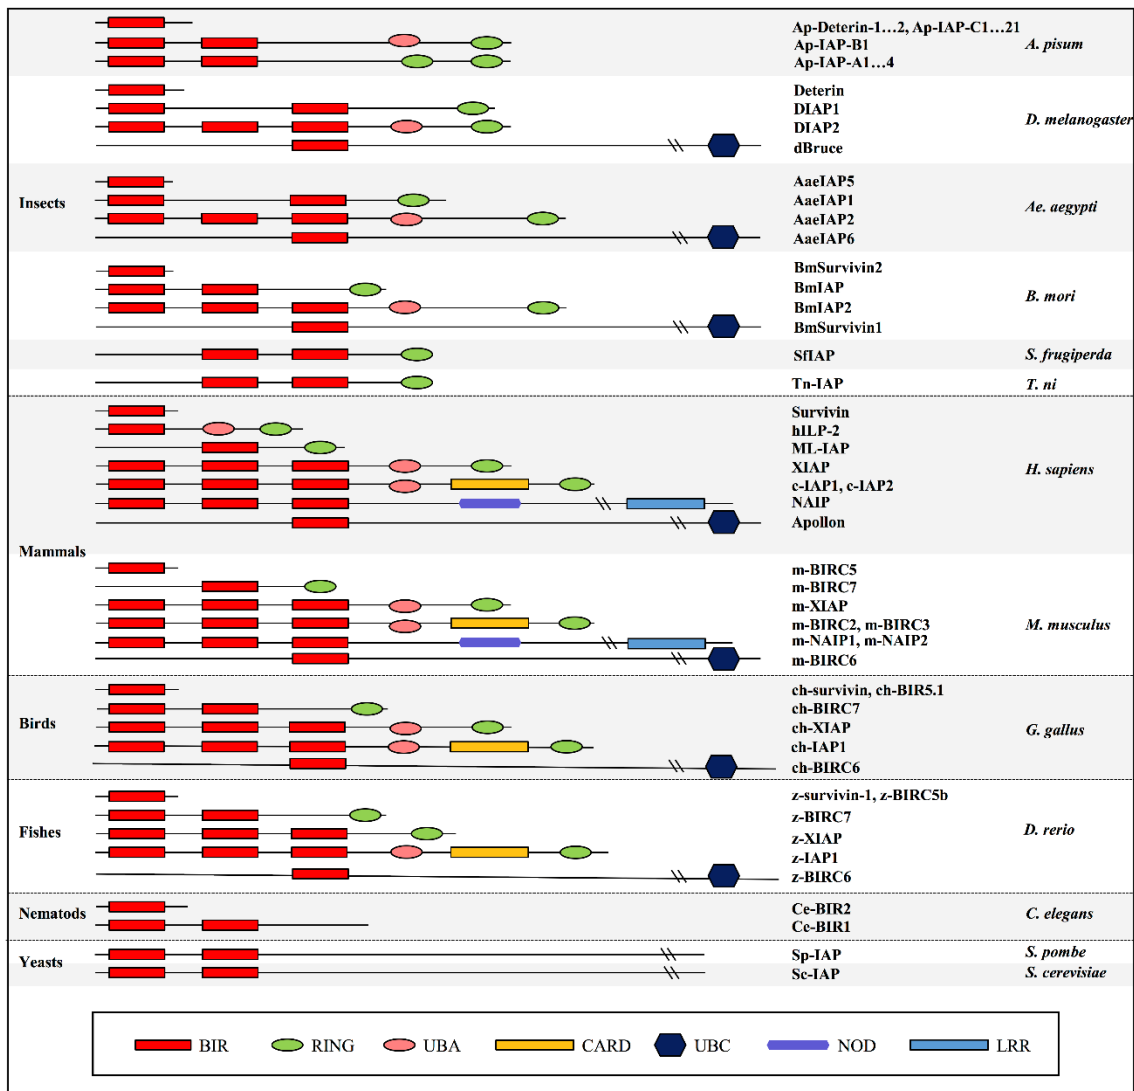

**Figure S4. Emergence of new structures in the pea aphid IAPs.** Domain composition of IAP proteins from different species (*Acyrtosiphon pisum*, *Drosophila melanogaster*, *Aedes aegypti*, *Bombyx mori*, *Spodoptera frugiperda*, *Trichoplusia ni*, *Homo sapiens*, *Mus musculus*, *Gallus gallus*, *Danio rerio*, *Caenorhabditis elegans*, *Schizosaccharomyces pombe* and *Saccharomyces cerevisiae*). Pea aphid IAPs present a limited structural diversity despite their important number: they contain two BIR domains at most and are completely devoid of UBC domain, consistent with the absence of a dBruce homolog in the pea aphid genome. However, the pea aphid is the only organism in which IAPs with two RING domains have been identified. BIR domains (Baculoviral IAP Repeat; ID: IPR001370), characteristics of the IAP protein family, are represented by a red rectangle, RING domains (Really Interesting New Gene) by a green oval, UBA domains (Ubiquitin Associated domains) by a pink oval, CARD domains (CAspase Recruitment Domain) by a pink rectangle, UBC domains (Ubiquitin-Conjugating Enzymes) by a blue hexagon, NOD domains (Nucleotide Oligomerization Domain) by a purple rectangle and LRR (Leucine Rich Repeat;) by a blue rectangle.

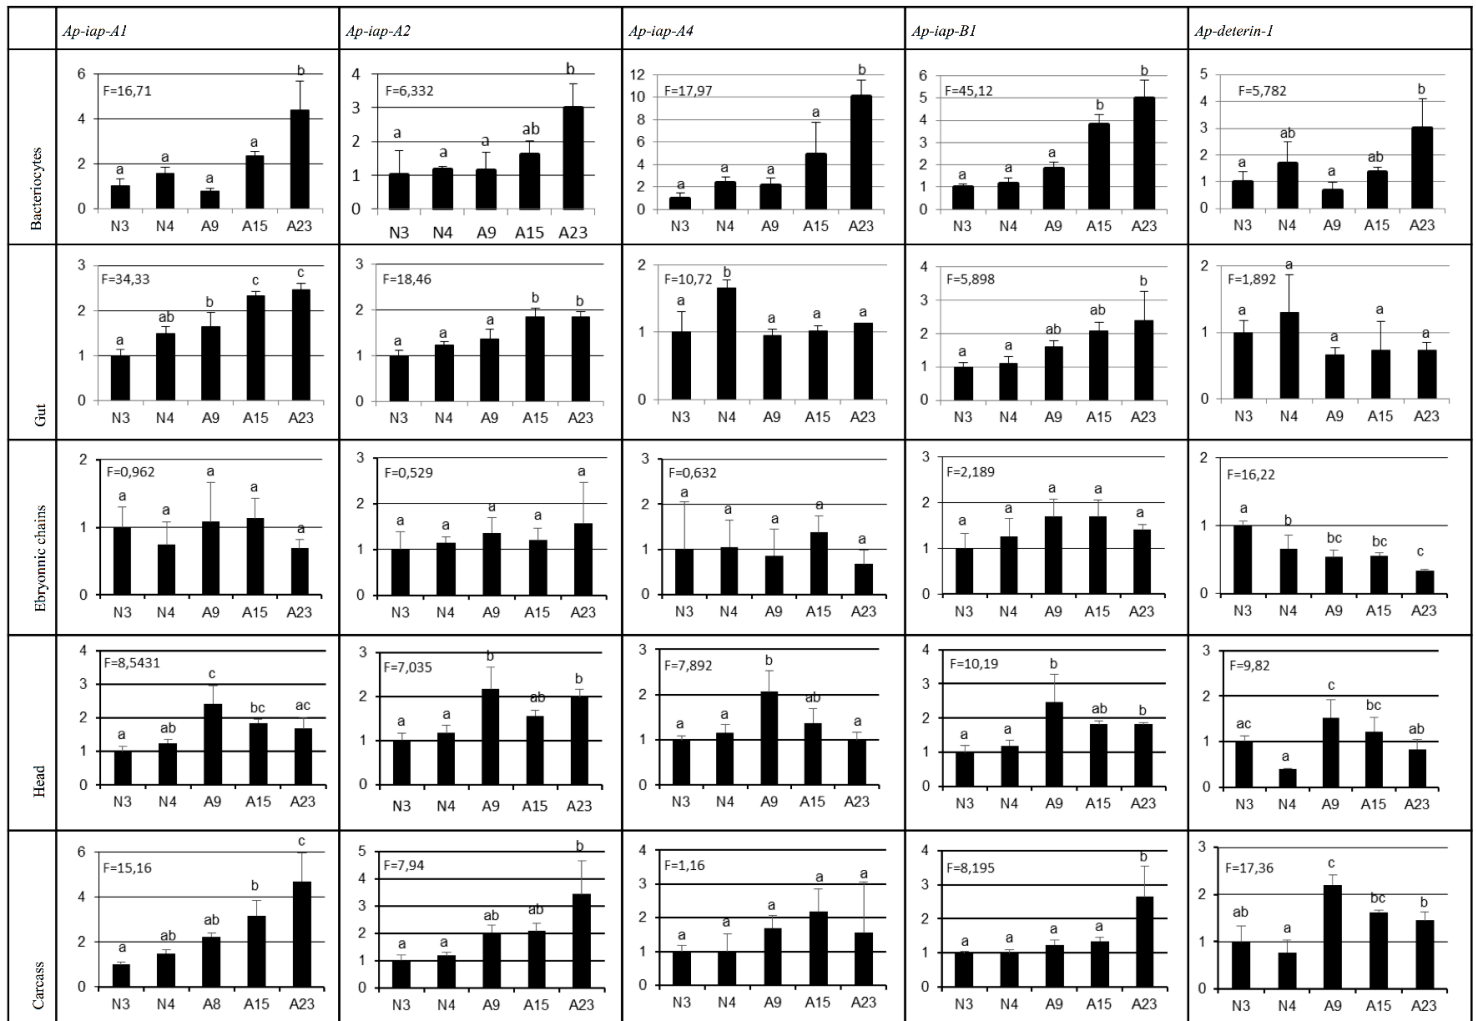

**Figure S5. Expression levels of bacteriocyte-specific *Ap-iaps* in different tissues throughout aphid development.** The expression levels were measured in five different tissues (bacteriocytes, gut, embryonic chains, head and carcass) and at five different development stages (N3 and N4: 3<sup>rd</sup> and 4<sup>th</sup> nymphal instars, respectively; A9, A15 and A23: adults at stages 9, 15 and 23, respectively), based on qRT-PCR data analysis. IAP gene-expression levels in the different tissues are expressed relative to the third-instar nymph levels and the *rp17* gene was used for data normalization. Data are presented as means±SD from three independent biological replicates. Data were analyzed by one-way ANOVA followed by a post hoc multiple-comparisons test (Tukey's HSD test). Life stages labeled with different letters are significantly different ( $P < 0.05$ ). ANOVA F values are indicated on each graph.

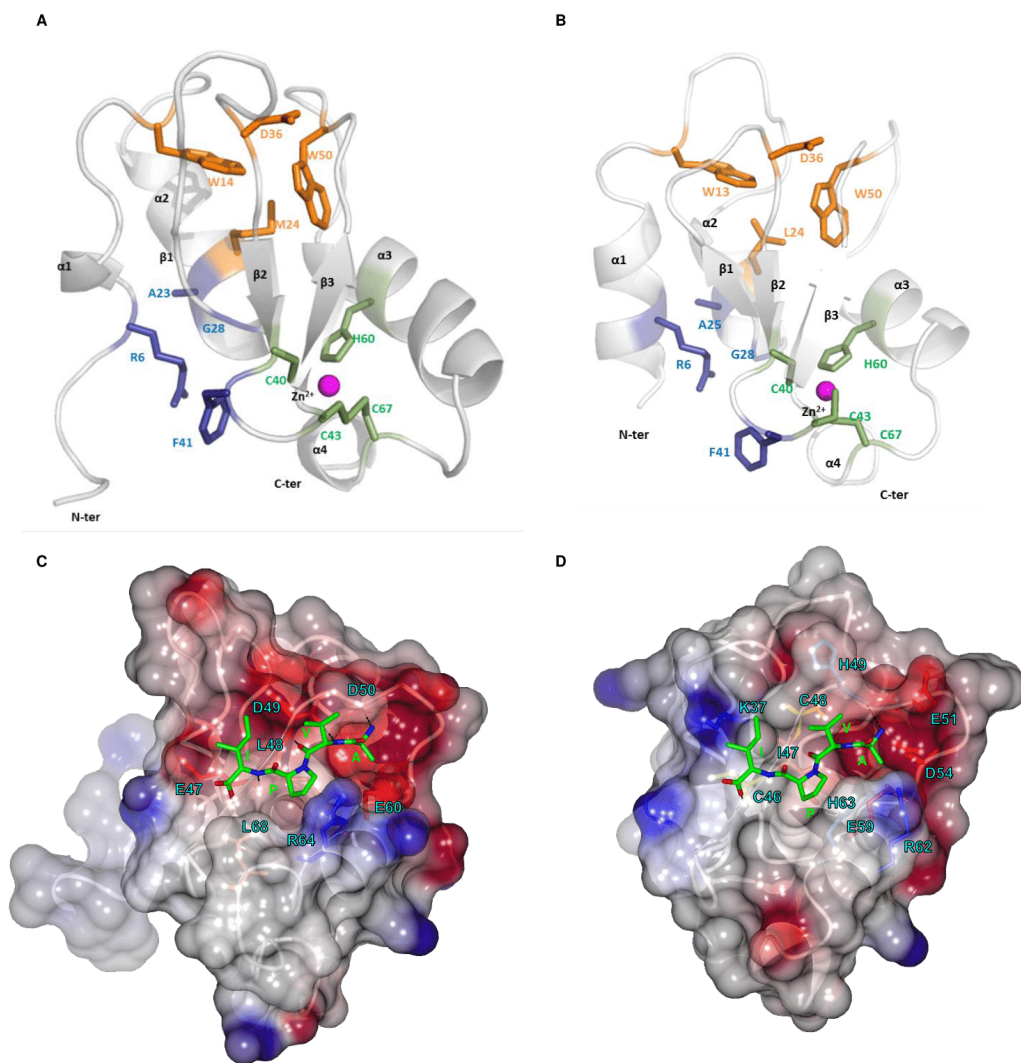

**Figure S6. 3D structure and secondary structure predictions of BIR1 domains in Ap-Deterin-1 and Ap-IAP-B1.** **A** 3D modeled structure prediction of Ap-Deterin-1\_BIR1 domain with focus on the three structural padlocks stabilizing the BIR specific zinc chelating fold: (i) the first  $Zn^{2+}$  (magenta) binding residue C40-C43-H60-C67 padlock in green sticks, (ii) the second R6-A23-G28-F41 padlock in blue sticks and (iii) the third W14-M24-D36-W50 padlock in orange sticks. **B** 3D modeled structure prediction of Ap-IAP-B1\_BIR1 domain with focus on the three structural padlocks stabilizing the BIR specific zinc chelating fold: (i) the first  $Zn^{2+}$  (magenta) binding residue C40-C43-H60-C67 padlock in green sticks, (ii) the second R6-A25-G28-F41 padlock in blue sticks and (iii) the third W14-L24-D36-W50 padlock in orange sticks. **C** Structural features of the predicted IBM groove of the Ap-Deterin-1\_BIR1 domain binding the tetrapeptide AVPI (in green stick). The electrostatic surface of Ap-Deterin-1\_BIR1 domain is represented with the negatively and positively charged regions highlighted in red and blue, respectively. Only the residues interacting with AVPI are represented as colored sticks and labeled. Hydrogen bonds anchoring the tetrapeptide AVPI in the IBM groove are represented as black dashes. **D** Structural features of the predicted IBM groove of the Ap-IAP-

B1\_BIR1 domain binding the tetrapeptide AVPI (in green stick). The electrostatic surface of Ap-IAP-B1\_BIR1 domain is represented with the negatively and positively charged regions highlighted in red and blue, respectively. Only the residues interacting with AVPI are represented as colored sticks and labeled. Hydrogen bonds anchoring the tetrapeptide AVPI in the IBM groove are represented as black dashes.

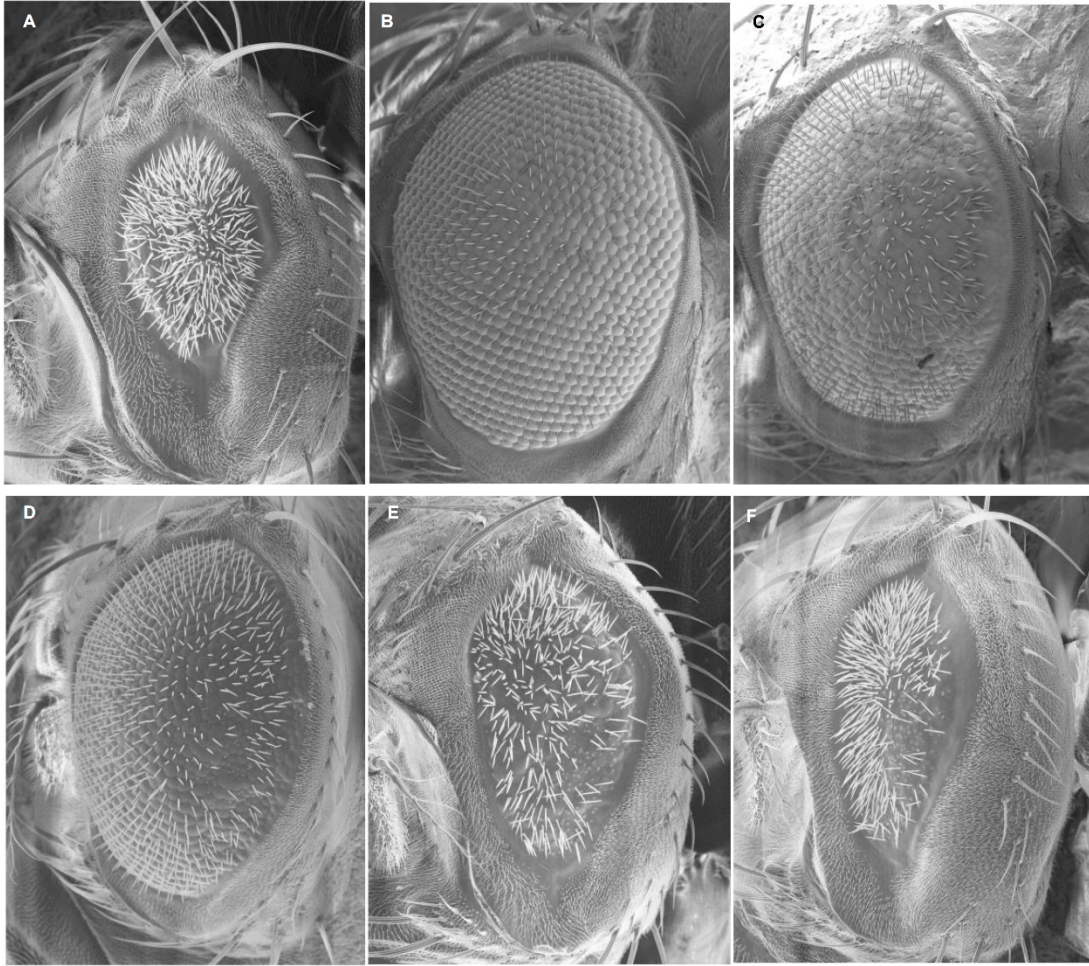

**Figure S7. Ap-IAPs are able to rescue induced apoptosis in *Drosophila* eyes in *in vivo* experiments.** **A** SEM picture of a control fly eye in which the apoptosis inducer gene *rpr* is continuously expressed. Imaging of eyes from different *Drosophila melanogaster* transgenic lines showed that the GMR-*rpr*-dependent small eye phenotype is nearly completely suppressed by coexpression of *Ap-iap-A1* (**B**), *Ap-iap-A2* (**C**) and *Ap-iap-A4* (**D**), while coexpression of *Ap-iap-B1* (**E**) and *Ap-deterin-1* (**F**) only partially suppress this phenotype. Nominal magnification in all images is 500x.

## Supplementary Tables

**Table S1. Annotation of the complete repertoire of pea aphid apoptosis related proteins.**

|                        | Name         | NCBI Accession number | Predicted transcripts | Length (AA) | Conserved domains         |
|------------------------|--------------|-----------------------|-----------------------|-------------|---------------------------|
| <b>Adaptor protein</b> | Ap-Ark       | LOC100571592          | 2                     | 1345        | CARD, NB-ARC, WD40 REPEAT |
| <b>Caspases</b>        | Ap-Dronc-1   | LOC100571705          | 3                     | 413         | CARD, CASc                |
|                        | Ap-Dronc-2   | LOC100569019          | 4                     | 411         | CARD, CASc                |
|                        | Ap-ICE-1     | LOC100162302          | 1                     | 315         | CASc                      |
|                        | Ap-ICE-2     | LOC100160647          | 2                     | 312-286     | CASc                      |
|                        | Ap-Decay-1   | LOC100161906          | 4                     | 459-448     | CASc                      |
|                        | Ap-Decay-2   | LOC115034111          | 1                     | 272         | CASc                      |
| <b>IAPs</b>            | Ap-Deterin-1 | Det                   | 2                     | 159-130     | BIR                       |
|                        | Ap-Deterin-2 | LOC100569400          | 1                     | 157         | BIR                       |
|                        | Ap-IAP-A1    | LOC103310098          | 5                     | 526-466     | BIR (2), RING (2)         |
|                        | Ap-IAP-A2    | LOC100159652          | 1                     | 415         | BIR (2), RING (2)         |
|                        | Ap-IAP-A3    | LOC100168361          | 1                     | 455         | BIR (2), RING (2)         |
|                        | Ap-IAP-A4    | LOC100168556          | 1                     | 482         | BIR (2), RING (2)         |
|                        | Ap-IAP-B1    | LOC100159034          | 1                     | 530         | BIR (2), RING, UBA        |
|                        | Ap-IAP-C1    | LOC103309101          | 1                     | 227         | BIR                       |
|                        | Ap-IAP-C2    | LOC103311428          | 1                     | 170         | BIR                       |
|                        | Ap-IAP-C3    | LOC107882438          | 1                     | 160         | BIR                       |
|                        | Ap-IAP-C4    | LOC115034795          | 1                     | 159         | BIR                       |
|                        | Ap-IAP-C5    | LOC115034796          | 1                     | 159         | BIR                       |
|                        | Ap-IAP-C6    | LOC115034872          | 1                     | 159         | BIR                       |
|                        | Ap-IAP-C7    | LOC115035070          | 1                     | 142         | BIR                       |
|                        | Ap-IAP-C8    | LOC103309011          | 1                     | 134         | BIR                       |
|                        | Ap-IAP-C9    | LOC103311764          | 1                     | 133         | BIR                       |
|                        | Ap-IAP-C10   | LOC103310572          | 1                     | 132         | BIR                       |
|                        | Ap-IAP-C11   | LOC103310750          | 1                     | 132         | BIR                       |
|                        | Ap-IAP-C12   | LOC115034852          | 1                     | 132         | BIR                       |
|                        | Ap-IAP-C13   | LOC115035087          | 1                     | 132         | BIR                       |
|                        | Ap-IAP-C14   | LOC103307944          | 1                     | 131         | BIR                       |
| Ap-IAP-C15             | LOC103308123 | 1                     | 131                   | BIR         |                           |
| Ap-IAP-C16             | LOC103309299 | 1                     | 131                   | BIR         |                           |
| Ap-IAP-C17             | LOC103310748 | 1                     | 131                   | BIR         |                           |
| Ap-IAP-C18             | LOC115033401 | 1                     | 131                   | BIR         |                           |
| Ap-IAP-C19             | LOC100570215 | 1                     | 128                   | BIR         |                           |
| Ap-IAP-C20             | LOC107885648 | 1                     | 128                   | BIR         |                           |
| Ap-IAP-C21             | LOC107883770 | 1                     | 123                   | BIR         |                           |

Putative pea aphid apoptosis related proteins are listed with the names they were attributed in this study. When more than one domain is present in the putative protein, the number is specified between brackets. Abbreviations: CARD: Caspase Recruitment Domain; NB-ARC: Nucleotide-Binding Adaptor shared by APAF-1, R proteins, and CED-4; CASc, CASpase catalytic domain; BIR, Baculoviral IAP Repeat; RING, Really Interesting New Gene; UBA, Ubiquitin-Associated domain.

**Table S2. Complete repertoire of adaptor and caspase proteins in the aphid lineage.**

| Species                          | NCBI<br>Accession number | AphidBase<br>Accession number | Predicted<br>transcripts | Length<br>(AA) | Conserved domains |
|----------------------------------|--------------------------|-------------------------------|--------------------------|----------------|-------------------|
| <i>Aphis glycines</i>            | /                        | <u>AG004743</u>               | 1                        | 408            | CARD, CASc        |
|                                  | /                        | <u>AG014444</u>               | 1                        | 399            | CARD, CASc        |
|                                  | /                        | <u>AG002421</u>               | 1                        | 1235           | CASc              |
|                                  | /                        | AG005720                      | 1                        | 314            | CASc              |
| <i>Aphis gossypii</i>            | <u>LOC114126303</u>      | /                             | 3                        | 408            | CARD, CASc        |
|                                  | <u>LOC114119019</u>      | /                             | 1                        | 397            | CARD, CASc        |
|                                  | <u>LOC114129378</u>      | /                             | 2                        | 456            | CASc              |
| <i>Cinara cedri</i>              | <u>VVC43788</u>          | /                             | 1                        | 413            | CARD, CASc        |
|                                  | <u>VVC33137</u>          | /                             | 1                        | 465            | CASc              |
|                                  | VVC43315                 | /                             | 2                        | 318-245        | CASc              |
| <i>Daktulospheira vitifoliae</i> | /                        | <u>DV3013013</u>              | 1                        | 439            | CARD, CASc        |
|                                  | /                        | <u>DV3011341</u>              | 1                        | 450            | CASc              |
|                                  | /                        | DV3008404                     | 1                        | 306            | CASc              |
|                                  | /                        | DV3008405                     | 1                        | 292            | CASc              |
| <i>Diuraphis noxia</i>           | <u>LOC107166680</u>      | /                             | 3                        | 413            | CARD, CASc        |
|                                  | <u>LOC107162114</u>      | /                             | 3                        | 459            | CASc              |
|                                  | LOC107168420             | /                             | 1                        | 312            | CASc              |
| <i>Melanaphis sacchari</i>       | <u>LOC112595911</u>      | /                             | 2                        | 408            | CARD, CASc        |
|                                  | <u>LOC112604125</u>      | /                             | 2                        | 456            | CASc              |
|                                  | LOC112597794             | /                             | 2                        | 328-314        | CASc              |
| <i>Myzus cerasi</i>              | /                        | <u>Mca20791</u>               | 1                        | 413            | CARD, CASc        |
|                                  | /                        | Mca23190                      | 1                        | 305            | CASc              |
|                                  | /                        | Mca28408                      | 1                        | 165            | CASc              |
|                                  | /                        | Mca26483                      | 1                        | 165            | CASc              |
|                                  | /                        | Mca05862                      | 1                        | 158            | CASc              |
| <i>Myzus persicae</i>            | <u>LOC111038906</u>      | /                             | 2                        | 414            | CARD, CASc        |
|                                  | <u>LOC111042739</u>      | /                             | 1                        | 415            | CARD, CASc        |
|                                  | <u>LOC111038323</u>      | /                             | 4                        | 465            | CASc              |
|                                  | LOC111029969             | /                             | 1                        | 312            | CASc              |
| <i>Rhopalosiphum maidis</i>      | <u>LOC113547787</u>      | /                             | 2                        | 409            | CARD, CASc        |
|                                  | <u>LOC113551225</u>      | /                             | 4                        | 457            | CASc              |
|                                  | LOC113557886             | /                             | 1                        | 386            | CASc              |
|                                  | LOC113550549             | /                             | 1                        | 314            | CASc              |
| <i>Rhopalosiphum padi</i>        | /                        | <u>g12615</u>                 | 1                        | 410            | CARD, CASc        |
|                                  | /                        | <u>g18354</u>                 | 1                        | 398            | CARD, CASc        |
|                                  | /                        | <u>g20133</u>                 | 1                        | 398            | CARD, CASc        |
|                                  | /                        | <u>g6358</u>                  | 1                        | 458            | CASc              |
|                                  | /                        | <u>g6029</u>                  | 1                        | 386            | CASc              |
| <i>Sipha flava</i>               | <u>LOC112682086</u>      | /                             | 1                        | 403            | CARD, CASc        |
|                                  | <u>LOC112682730</u>      | /                             | 3                        | 454            | CASc              |
|                                  | LOC112687160             | /                             | 1                        | 310            | CASc              |
|                                  | LOC112687159             | /                             | 1                        | 272            | CASc              |

Genes encoding proteins with a long prodomain of more than 100 amino acids (putative initiator capsases) are written in bold and underlined. Abbreviations: CARD: CASpase Recruitment Domain; CASc, CASpase catalytic domain.

**Table S3. Complete repertoire of IAPs in the aphid lineage.**

| Species               | NCBI<br>Accession number | AphidBase<br>Accession number | Predicted<br>transcripts | Size<br>(AA) | Conserved domains  |
|-----------------------|--------------------------|-------------------------------|--------------------------|--------------|--------------------|
| <i>Aphis glycines</i> | /                        | AG006812                      | 1                        | 618          | BIR (5), RING (2)  |
|                       | /                        | AG017437                      | 1                        | 438          | BIR (5)            |
|                       | /                        | AG012793                      | 1                        | 635          | BIR (4), RING (3)  |
|                       | /                        | AG013373                      | 1                        | 476          | BIR (3), RING (2)  |
|                       | /                        | AG015575                      | 1                        | 461          | BIR (3), RING      |
|                       | /                        | AG007395                      | 1                        | 482          | BIR (2), RING (2)  |
|                       | /                        | AG007064                      | 1                        | 476          | BIR (2), RING (2)  |
|                       | /                        | AG017243                      | 1                        | 410          | BIR (2), RING (2)  |
|                       | /                        | AG007394                      | 1                        | 566          | BIR (2), RING      |
|                       | /                        | AG018494                      | 1                        | 360          | BIR (2), RING      |
|                       | /                        | AG019006                      | 1                        | 355          | BIR (2), RING      |
|                       | /                        | AG018229                      | 1                        | 271          | BIR (2), RING      |
|                       | /                        | AG017012                      | 1                        | 337          | BIR (2)            |
|                       | /                        | AG018513                      | 1                        | 312          | BIR (2)            |
|                       | /                        | AG018191                      | 1                        | 213          | BIR (2)            |
|                       | /                        | AG009711                      | 1                        | 501          | BIR, RING          |
|                       | /                        | AG013324                      | 1                        | 338          | BIR                |
|                       | /                        | AG017296                      | 1                        | 219          | BIR                |
|                       | /                        | AG017365                      | 1                        | 219          | BIR                |
|                       | /                        | AG011999                      | 1                        | 164          | BIR                |
|                       | /                        | AG010471                      | 1                        | 159          | BIR                |
|                       | /                        | AG013679                      | 1                        | 156          | BIR                |
|                       | /                        | AG012752                      | 1                        | 132          | BIR                |
| /                     | AG012794                 | 1                             | 122                      | BIR          |                    |
| /                     | AG018976                 | 1                             | 110                      | BIR          |                    |
| /                     | AG018327                 | 1                             | 80                       | BIR          |                    |
| <i>Aphis gossypii</i> | LOC114130948             | /                             | 1                        | 618          | BIR (5), RING (2)  |
|                       | LOC114131776             | /                             | 1                        | 241          | BIR (3)            |
|                       | LOC114120528             | /                             | 1                        | 512          | BIR (2), RING (2)  |
|                       | LOC114121048             | /                             | 1                        | 482          | BIR (2), RING (2)  |
|                       | LOC114121448             | /                             | 1                        | 376          | BIR (2), RING (2)  |
|                       | LOC114121047             | /                             | 1                        | 503          | BIR (2), RING, UBA |
|                       | LOC114121450             | /                             | 1                        | 150          | BIR (2)            |
|                       | LOC114127554             | /                             | 1                        | 301          | BIR, RING          |
|                       | LOC114126338             | /                             | 1                        | 243          | BIR                |
|                       | LOC114119937             | /                             | 1                        | 159          | BIR                |
| <i>Cinara cedri</i>   | VVC38797                 | /                             | 1                        | 716          | BIR (2), RING (2)  |
|                       | VVC41444                 | /                             | 2                        | 575-431      | BIR (2), RING (2)  |
|                       | VVC34545                 | /                             | 2                        | 477-450      | BIR (2), RING (2)  |
|                       | VVC24365                 | /                             | 3                        | 474-458      | BIR (2), RING (2)  |
|                       | VVC46145                 | /                             | 1                        | 445          | BIR (2), RING (2)  |
|                       | VVC29531                 | /                             | 1                        | 433          | BIR (2), RING (2)  |
|                       | VVC24368                 | /                             | 1                        | 531          | BIR (2), RING, UBA |
|                       | VVC29856                 | /                             | 1                        | 156          | BIR                |
|                       | VVC41669                 | /                             | 1                        | 156          | BIR                |
|                       | VVC33236                 | /                             | 1                        | 151          | BIR                |
|                       | VVC44076                 | /                             | 1                        | 131          | BIR                |
|                       | VVC26684                 | /                             | 1                        | 97           | BIR                |



|                                  |              |           |    |         |                    |
|----------------------------------|--------------|-----------|----|---------|--------------------|
| <i>Daktulospheira vitifoliae</i> | /            | DV3009948 | 1  | 483     | BIR (2), RING (2)  |
|                                  | /            | DV3009949 | 1  | 484     | BIR (2), RING, UBA |
|                                  | /            | DV3016500 | 1  | 171     | BIR (2)            |
|                                  | /            | DV3014705 | 1  | 171     | BIR (2)            |
|                                  | /            | DV3008798 | 1  | 432     | BIR                |
|                                  | /            | DV3022113 | 1  | 366     | BIR                |
|                                  | /            | DV3016501 | 1  | 237     | BIR                |
|                                  | /            | DV3006888 | 1  | 157     | BIR                |
|                                  | /            | DV3008759 | 1  | 153     | BIR                |
|                                  | /            | DV3023284 | 1  | 143     | BIR                |
|                                  | /            | DV3003143 | 1  | 139     | BIR                |
|                                  | /            | DV3014638 | 1  | 139     | BIR                |
|                                  | /            | DV3017300 | 1  | 138     | BIR                |
|                                  | /            | DV3021476 | 1  | 137     | BIR                |
|                                  | /            | DV3023181 | 1  | 134     | BIR                |
|                                  | /            | DV3019768 | 1  | 132     | BIR                |
|                                  | /            | DV3017336 | 1  | 129     | BIR                |
|                                  | /            | DV3020822 | 1  | 124     | BIR                |
|                                  | /            | DV3021159 | 1  | 121     | BIR                |
|                                  | /            | DV3002495 | 1  | 120     | BIR                |
|                                  | /            | DV3019788 | 1  | 120     | BIR                |
|                                  | /            | DV3019024 | 1  | 119     | BIR                |
|                                  | /            | DV3018103 | 1  | 109     | BIR                |
|                                  | /            | DV3012104 | 1  | 109     | BIR                |
|                                  | /            | DV3003461 | 1  | 106     | BIR                |
|                                  | /            | DV3011323 | 1  | 100     | BIR                |
|                                  | /            | DV3004969 | 1  | 76      | BIR                |
|                                  | /            | DV3021895 | 1  | 67      | BIR                |
|                                  | /            | DV3020843 | 1  | 62      | BIR                |
|                                  | /            | DV3000295 | 1  | 61      | BIR                |
| /                                | DV3011561    | 1         | 49 | BIR     |                    |
| <i>Diuraphis noxia</i>           | LOC107166234 | /         | 4  | 477-466 | BIR (2), RING (2)  |
|                                  | LOC107173012 | /         | 1  | 466     | BIR (2), RING (2)  |
|                                  | LOC107165677 | /         | 1  | 458     | BIR (2), RING (2)  |
|                                  | LOC107166235 | /         | 1  | 257     | BIR (2)            |
|                                  | LOC107168615 | /         | 1  | 159     | BIR                |
|                                  | LOC107170930 | /         | 1  | 98      | BIR                |
| <i>Melanaphis sacchari</i>       | LOC112600252 | /         | 1  | 491     | BIR (3), RING (2)  |
|                                  | LOC112592348 | /         | 1  | 473     | BIR (3), RING (2)  |
|                                  | LOC112600254 | /         | 1  | 460     | BIR (3), RING (2)  |
|                                  | LOC112590851 | /         | 3  | 485-474 | BIR (2), RING (2)  |
|                                  | LOC112600020 | /         | 1  | 465     | BIR (2), RING (2)  |
|                                  | LOC112590850 | /         | 1  | 496     | BIR (2), RING      |
|                                  | LOC112604327 | /         | 1  | 159     | BIR                |
|                                  | LOC112593942 | /         | 1  | 149     | BIR                |
|                                  | LOC112598371 | /         | 1  | 135     | BIR                |
|                                  | LOC112592002 | /         | 1  | 134     | BIR                |
|                                  | LOC112592448 | /         | 1  | 134     | BIR                |
|                                  | LOC112593875 | /         | 1  | 134     | BIR                |
|                                  | LOC112594694 | /         | 1  | 134     | BIR                |
|                                  | LOC112596504 | /         | 1  | 134     | BIR                |
|                                  | LOC112603410 | /         | 1  | 134     | BIR                |
|                                  | LOC112600360 | /         | 1  | 120     | BIR                |
|                                  | LOC112592222 | /         | 1  | 107     | BIR                |
|                                  | LOC112591322 | /         | 1  | 90      | BIR                |

|                           |                             |              |        |         |                    |                   |
|---------------------------|-----------------------------|--------------|--------|---------|--------------------|-------------------|
|                           | LOC112593863                | /            | 1      | 90      | BIR                |                   |
| <i>Myzus cerasi</i>       | /                           | Mca10116     | 1      | 557     | BIR (4), RING (2)  |                   |
|                           | /                           | Mca10160     | 1      | 468     | BIR (2), RING (2)  |                   |
|                           | /                           | Mca19538     | 1      | 460     | BIR (2), RING (2)  |                   |
|                           | /                           | Mca15052     | 1      | 492     | BIR (2), RING, UBA |                   |
|                           | /                           | Mca17716     | 1      | 213     | BIR, RING          |                   |
|                           | /                           | Mca18774     | 1      | 257     | BIR                |                   |
|                           | /                           | Mca00372     | 1      | 158     | BIR                |                   |
|                           | /                           | Mca17715     | 1      | 148     | BIR                |                   |
|                           | /                           | Mca21955     | 1      | 138     | BIR                |                   |
| <i>Myzus persicae</i>     | LOC111039944                | /            | 1      | 557     | BIR (4), RING (2)  |                   |
|                           | LOC111027568                | /            | 4      | 479-468 | BIR (2), RING (2)  |                   |
|                           | LOC111039746                | /            | 1      | 460     | BIR (2), RING, UBA |                   |
|                           | LOC111027549                | /            | 6      | 521-497 | BIR (2), RING, UBA |                   |
|                           | LOC111032732                | /            | 1      | 498     | BIR, RING          |                   |
|                           | LOC111028900                | /            | 1      | 174     | BIR                |                   |
|                           | LOC111042344                | /            | 1      | 160     | BIR                |                   |
|                           | LOC111037378                | /            | 2      | 159     | BIR                |                   |
|                           | LOC111040353                | /            | 1      | 159     | BIR                |                   |
|                           | LOC111026657                | /            | 1      | 151     | BIR                |                   |
|                           | LOC111038800                | /            | 1      | 145     | BIR                |                   |
|                           | LOC111033785                | /            | 1      | 138     | BIR                |                   |
|                           | LOC111026214                | /            | 1      | 133     | BIR                |                   |
|                           | LOC111026337                | /            | 1      | 133     | BIR                |                   |
|                           | LOC111026737                | /            | 1      | 133     | BIR                |                   |
|                           | LOC111027498                | /            | 1      | 133     | BIR                |                   |
|                           | LOC111039762                | /            | 1      | 133     | BIR                |                   |
|                           | LOC111040897                | /            | 1      | 123     | BIR                |                   |
|                           | LOC111027266                | /            | 1      | 112     | BIR                |                   |
|                           | LOC111041131                | /            | 1      | 104     | BIR                |                   |
|                           | LOC111041395                | /            | 1      | 104     | BIR                |                   |
|                           | <i>Rhopalosiphum maidis</i> | LOC113558592 | /      | 1       | 517                | BIR (3), RING (2) |
|                           |                             | LOC113557951 | /      | 1       | 499                | BIR (3), RING (2) |
| LOC113557944              |                             | /            | 1      | 473     | BIR (3), RING (2)  |                   |
| LOC113558506              |                             | /            | 1      | 470     | BIR (3), RING (2)  |                   |
| LOC113558071              |                             | /            | 1      | 361     | BIR (3)            |                   |
| LOC113559418              |                             | /            | 1      | 491     | BIR (2), RING (2)  |                   |
| LOC113556324              |                             | /            | 3      | 482-471 | BIR (2), RING (2)  |                   |
| LOC113553059              |                             | /            | 2      | 482-471 | BIR (2), RING (2)  |                   |
| LOC113556228              |                             | /            | 1      | 506     | BIR (2), RING, UBA |                   |
| LOC113558419              |                             | /            | 3      | 581-447 | BIR (1), RING (2)  |                   |
| LOC113554160              |                             | /            | 2      | 159     | BIR                |                   |
| LOC113559037              |                             | /            | 1      | 96      | BIR                |                   |
| <i>Rhopalosiphum padi</i> |                             | /            | g26140 | 1       | 545                | BIR (4), RING (2) |
|                           | /                           | g11402       | 1      | 524     | BIR (3), RING (2)  |                   |
|                           | /                           | g10703       | 1      | 492     | BIR (3), RING (2)  |                   |
|                           | /                           | g23251       | 1      | 472     | BIR (3), RING      |                   |
|                           | /                           | g11401       | 1      | 311     | BIR (3)            |                   |
|                           | /                           | g10367       | 1      | 595     | BIR (2), RING (2)  |                   |
|                           | /                           | g15101       | 1      | 495     | BIR (2), RING (2)  |                   |
|                           | /                           | g10369       | 1      | 507     | BIR (2), RING, UBA |                   |
|                           | /                           | g20480       | 1      | 511     | BIR, RING (2)      |                   |
|                           | /                           | g19135       | 1      | 546     | BIR                |                   |
|                           | /                           | g12191       | 1      | 504     | BIR                |                   |

|                    |              |        |   |     |                   |
|--------------------|--------------|--------|---|-----|-------------------|
|                    | /            | g23890 | 1 | 327 | BIR               |
|                    | /            | g16933 | 1 | 177 | BIR               |
|                    | /            | g12803 | 1 | 176 | BIR               |
|                    | /            | g24927 | 1 | 170 | BIR               |
|                    | /            | g22618 | 1 | 166 | BIR               |
|                    | /            | g20895 | 1 | 135 | BIR               |
|                    | /            | g20025 | 1 | 135 | BIR               |
|                    | /            | g23385 | 1 | 134 | BIR               |
|                    | /            | g14956 | 1 | 134 | BIR               |
| <i>Sipha flava</i> | LOC112686708 | /      | 1 | 551 | BIR (2), RING (2) |
|                    | LOC112686705 | /      | 5 | 470 | BIR (2), RING (2) |
|                    | LOC112688984 | /      | 1 | 240 | BIR (2)           |
|                    | LOC112681260 | /      | 1 | 281 | BIR (1), RING (2) |
|                    | LOC112684840 | /      | 1 | 160 | BIR               |
|                    | LOC112683532 | /      | 1 | 150 | BIR               |
|                    | LOC112680278 | /      | 1 | 129 | BIR               |
|                    | LOC112681261 | /      | 1 | 119 | BIR               |
|                    | LOC112685876 | /      | 1 | 112 | BIR               |
|                    | LOC112679781 | /      | 1 | 105 | BIR               |

---

When more than one domain is present, the number is specified between brackets. Abbreviations: BIR, Baculoviral IAP Repeat ; RING, Really Interesting New Gene; UBA, Ubiquitin-Associated domain.

**Table S4. Caspases and IAP sequences used for pea aphid proteins identification and phylogenetic reconstruction.**

| Insect order                 | Species                        | Protein name           | NCBI identifier |                |
|------------------------------|--------------------------------|------------------------|-----------------|----------------|
| <b>Caspases</b>              |                                |                        |                 |                |
| Diptera                      | <i>Drosophila melanogaster</i> | Dronc                  | NP_524017.1     |                |
|                              |                                | Dredd                  | NP_477249.3     |                |
|                              |                                | Strica                 | NP_610193.1     |                |
|                              |                                | DrICE                  | NP_524551.2     |                |
|                              |                                | Dcp-1                  | NP_476974.1     |                |
|                              |                                | Decay                  | NP_477462.1     |                |
|                              |                                | Damm                   | NP_523703.2     |                |
|                              |                                | <i>Aedes aegypti</i>   | AaeDronc        | XP_001655433.2 |
|                              |                                |                        | AaeDredd        | XP_021711617.1 |
|                              | AaeCASPS7                      |                        | XP_021704883.1  |                |
|                              | AaeCASPS8                      |                        | XP_001648537.2  |                |
|                              | AaeCASPS15/16                  |                        | XP_021709830.1  |                |
|                              | AaeCASPS17                     |                        | XP_021709833.1  |                |
|                              | AaeCASPS18                     |                        | XP_001656810.1  |                |
|                              | AaeCASPS19                     |                        | XP_001656809.1  |                |
|                              | AaeCASPS20                     |                        | XP_021694895.1  |                |
|                              | AaeCASPS21                     |                        | XP_021709829.1  |                |
|                              | Lepidoptera                    | <i>Bombyx mori</i>     | BmDronc         | NP_001182396.1 |
|                              |                                |                        | BmDredd         | NP_001108337.1 |
| BmICE-1                      |                                |                        | NP_001037297.1  |                |
| BmICE-5                      |                                |                        | NP_001106741.1  |                |
| BmCaspase-1                  |                                |                        | NP_001037050.1  |                |
| BmCaspase-N                  |                                |                        | NP_001243935.1  |                |
| <i>Helicoverpa armigera</i>  |                                | Ha-caspase-1           | XP_021183524.1  |                |
| <i>Spodoptera frugiperda</i> |                                | Sf-caspase-1           | P89116.1        |                |
|                              |                                | SfDronc                | AGG91491.1      |                |
|                              |                                | SfDredd                | AMR71144.1      |                |
|                              |                                | <i>Trichoplusia ni</i> | Tn-caspase-1    | XP_026742653.1 |
| Hemiptera                    | <i>Bemisia tabaci</i>          | Bt-caspase-1           | XP_018897656.1  |                |
|                              |                                | Bt-caspase-3b          | XP_018914007.1  |                |
| <b>IAPs</b>                  |                                |                        |                 |                |
| Diptera                      | <i>Drosophila melanogaster</i> | dBruce                 | NP_001262460.1  |                |
|                              |                                | Deterin                | NP_650608.1     |                |
|                              |                                | DIAP1                  | NP_524101.2     |                |
|                              |                                | DIAP2                  | NP_477127.1     |                |
|                              | <i>Aedes aegypti</i>           | AaeIAP6                | XP_021713190.1  |                |
|                              |                                | AaeIAP5                | XP_001648266.1  |                |
|                              |                                | AaeIAP1                | XP_021695484.1  |                |
|                              |                                | AaeIAP2                | XP_021705807.1  |                |

**Table S5. Oligonucleotides used in this study.**

| Target                                                                                                                          | Name               | Sequence 5'-3'                                               | Orientation |
|---------------------------------------------------------------------------------------------------------------------------------|--------------------|--------------------------------------------------------------|-------------|
| <b>Primers for RT and qRT-PCR</b>                                                                                               |                    |                                                              |             |
| Ap-Ark                                                                                                                          | Ap-Ark-F           | TCGAAGGCTTGGATCAATGGT                                        | Forward     |
|                                                                                                                                 | Ap-Ark-R           | TGCAATTCAGACTGTACACGG                                        | Reverse     |
| Ap-Dronc-1                                                                                                                      | Ap-Dronc-1-F       | ACTGCAATACGTGATCCAATAGA                                      | Forward     |
|                                                                                                                                 | Ap-Dronc-1-R       | CATCAATCTAGCCAATTCGGTATTA                                    | Reverse     |
| Ap-Dronc-2                                                                                                                      | Ap-Dronc-2-F       | GGCATACTGCTAAACGTGATCC                                       | Forward     |
|                                                                                                                                 | Ap-Dronc-2-R       | TGCATTCAATTCAGTGTATAGGCA                                     | Reverse     |
| Ap-ICE-1                                                                                                                        | Ap-ICE-1-F         | ACATGGTAACCACGATACAAAAC                                      | Forward     |
|                                                                                                                                 | Ap-ICE-1-R         | AGTGTCTTGCCAGGTTGAT                                          | Reverse     |
| Ap-ICE-2                                                                                                                        | Ap-ICE-2-F         | GCAACTCCGTAACACTACAACTGC                                     | Forward     |
|                                                                                                                                 | Ap-ICE-2-R         | AAAAGCGTCGGCAGTGTCA                                          | Reverse     |
| Ap-Decay-1                                                                                                                      | Ap-Decay-1-F       | ACACGGTCTTCTTCAGGCAG                                         | Forward     |
|                                                                                                                                 | Ap-Decay-1-R       | TTGAGTTGGTCGGGCATCAA                                         | Reverse     |
| Ap-Decay-2                                                                                                                      | Ap-Decay-2-F       | ATTGTTGTGTTGACACACGGG                                        | Forward     |
|                                                                                                                                 | Ap-Decay-2-R       | AGTTTAGGTTTTCCGGCTAGTGT                                      | Reverse     |
| Ap-IAP-A1                                                                                                                       | Ap-IAP-A1-F        | GTTCCCATTTCGATGTTGTGC                                        | Forward     |
|                                                                                                                                 | Ap-IAP-A1-R        | CACACAGCACACTGTTGAG                                          | Reverse     |
| Ap-IAP-A2                                                                                                                       | Ap-IAP-A2-F        | CCCTTGCTTTCACACCATTGC                                        | Forward     |
|                                                                                                                                 | Ap-IAP-A2-R        | TCTTGACGTTTTCTTCGTCCA                                        | Reverse     |
| Ap-IAP-A3                                                                                                                       | Ap-IAP-A3-F        | TGAAAGTGGCTTGTGTCCCT                                         | Forward     |
|                                                                                                                                 | Ap-IAP-A3-R        | CAGGTCCATCGGCTGTCTAC                                         | Reverse     |
| Ap-IAP-A4                                                                                                                       | Ap-IAP-A4-F        | CCAAGGTCTGATGGATTGGGA                                        | Forward     |
|                                                                                                                                 | Ap-IAP-A4-R        | TTCACCACCAACCTTCCAC                                          | Reverse     |
| Ap-IAP-B1                                                                                                                       | Ap-IAP-B1-F        | CGTCGTTTGAAAGAAGCCCG                                         | Forward     |
|                                                                                                                                 | Ap-IAP-B1-R        | AGTAGCCTTGATGGTCTGTGC                                        | Reverse     |
| Ap-Deterin-1                                                                                                                    | Ap-Deterin-1-F     | GAACCCCTTCAACACATCTGG                                        | Forward     |
|                                                                                                                                 | Ap-Deterin-1-R     | CTGCTTCGGCCATATCCTTG                                         | Reverse     |
| Ap-Deterin-2                                                                                                                    | Ap-Deterin-2-F     | AAATGGCCGAAGCAGGTTTTT                                        | Forward     |
|                                                                                                                                 | Ap-Deterin-2-R     | AAGGCTGGTCAGTTGGCTC                                          | Reverse     |
| <b>Primers for gene amplification prior to Gateway cloning (sequences corresponding to attb1 and attb2 tail are underlined)</b> |                    |                                                              |             |
| Ap-IAP-A1                                                                                                                       | Ap-IAP-A1-attb1    | <u>GGGGACA</u> ACTTTGTACAAAAAAGTTGGCACCATGTCCAACGGATGCCCG    | Forward     |
|                                                                                                                                 | Ap-IAP-A1-attb2    | <u>GGGGACA</u> ACTTTGTACAAGAAAGTTGGCAACTATAAGTACACTGTATGGTGG | Reverse     |
| Ap-IAP-A2                                                                                                                       | Ap-IAP-A2-attb1    | <u>GGGGACA</u> ACTTTGTACAAAAAAGTTGGCACCATGATAAAGGTTTCATTCCCA | Forward     |
|                                                                                                                                 | Ap-IAP-A2-attb2    | <u>GGGGACA</u> ACTTTGTACAAGAAAGTTGGCAACTATAAGTACACTGTATGG    | Reverse     |
| Ap-IAP-A4                                                                                                                       | Ap-IAP-A4-attb1    | <u>GGGGACA</u> ACTTTGTACAAAAAAGTTGGCACCAGAAATATTTGGCACCGC    | Forward     |
|                                                                                                                                 | Ap-IAP-A4-attb2    | <u>GGGGACA</u> ACTTTGTACAAGAAAGTTGGCAACTATAAGAACACTTGCATAT   | Reverse     |
| Ap-IAP-B1                                                                                                                       | Ap-IAP-B1-attb1    | <u>GGGGACA</u> ACTTTGTACAAAAAAGTTGGCACCATGGAATCGCCACAGTCA    | Forward     |
|                                                                                                                                 | Ap-IAP-B1-attb2    | <u>GGGGACA</u> ACTTTGTACAAGAAAGTTGGCAATTAAGAAAGGAATGTACGAAC  | Reverse     |
| Ap-Deterin-1                                                                                                                    | Ap-Deterin-1-attb1 | <u>GGGGACA</u> ACTTTGTACAAAAAAGTTGGCACCATGGAGAATCGACAACGT    | Forward     |
|                                                                                                                                 | Ap-Deterin-1-attb2 | <u>GGGGACA</u> ACTTTGTACAAGAAAGTTGGCAATCATGACATTCCTTTTTTTGG  | Reverse     |

## Dataset legends

**Dataset S1 (separate file).** Similarity between *Acyrtosiphon pisum* and *Drosophila melanogaster* caspase protein sequences.

**Dataset S2 (separate file).** Similarity between *Acyrtosiphon pisum* and *Drosophila melanogaster* IAP protein sequences.
